# Supplementary material for: Optimization of Zika virus envelope protein production for ELISA and correlation of antibody titers with virus neutralization in Mexican patients from an arbovirus endemic region
Source: PubMed Central journal article supplement (PMC6307127; doi:10.1186/s12985-018-1104-6), 2018-12-27
Supplement: 12985_2018_1104_MOESM2_ESM.pdf [file 12985_2018_1104_MOESM2_ESM.pdf]

| Description (a.a) | Vector               | CD4     | Secretions (N=3) |
|-------------------|----------------------|---------|------------------|
| prM-Env 1-612     | pOPINTTGneo          | (-) CD4 |                  |
| prM-Env 1-603     | pOPINTTGneo          |         |                  |
| prM-Env 1-595     | pOPINTTGneo          |         |                  |
| prM-Env 1-589     | pOPINTTGneo          |         |                  |
| prM-Env 1-612     | pOPINTTGneo -3C -CD4 | (+) CD4 |                  |
| prM-Env 1-603     | pOPINTTGneo -3C -CD4 |         |                  |
| prM-Env 1-595     | pOPINTTGneo -3C -CD4 |         |                  |
| prM-Env 1-589     | pOPINTTGneo -3C -CD4 |         |                  |
| Env 187-612       | pOPINTTGneo          | (-) CD4 |                  |
| Env 187-603       | pOPINTTGneo          |         |                  |
| Env 187-595       | pOPINTTGneo          |         |                  |
| Env 187-589       | pOPINTTGneo          |         |                  |
| Env 187-612       | pOPINTTGneo -3C -CD4 | +CD4    |                  |
| Env 187-603       | pOPINTTGneo -3C -CD4 |         |                  |
| Env 187-595       | pOPINTTGneo -3C -CD4 |         |                  |
| Env 187-589       | pOPINTTGneo -3C -CD4 |         |                  |
