# Supplementary material for: Optimization of Zika virus envelope protein production for ELISA and correlation of antibody titers with virus neutralization in Mexican patients from an arbovirus endemic region
Source: PubMed Central journal article supplement (PMC6307127; doi:10.1186/s12985-018-1104-6), 2018-12-27
Supplement: 12985_2018_1104_MOESM3_ESM.pdf [file 12985_2018_1104_MOESM3_ESM.pdf]

# Asian ZIKV Env-CD4 (ng)

Reducing

Non-Reducing

500

250

500

250

kDa

100

75

50

37

25

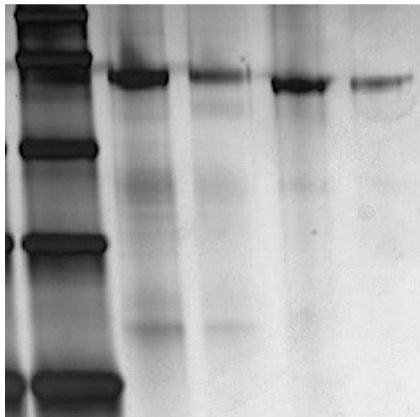

← Env-CD4

← Env

← CD4
